# Supplementary material for: Thermal fragmentation of spirodithiohydantoins: A novel route to NHCs
Source: Royal Society of Chemistry journal article supplement (doi:10.1039/c2ra22487a), 2012-11-13
Supplement: c2ra22487a.pdf [file c2ra22487a.pdf]

## Supplementary Information

### Thermal Fragmentation of Spirodithiohydantoins: A Novel Route to NHCs

Davit Jishkariani,<sup>a</sup> C. Dennis Hall,<sup>a</sup> Alexander Oliferenko,<sup>a</sup> Blake J. Tomlin,<sup>a</sup> Peter J. Steel<sup>b</sup> and

Alan R. Katritzky<sup>\*a,c</sup>

<sup>a</sup> Center for Heterocyclic Compounds, Department of Chemistry, University of Florida, Gainesville, FL 32611-7200. Fax: +1-352-392-9199; Tel: +1-352-392-0554; E-mail: [katritzky@chem.ufl.edu](mailto:katritzky@chem.ufl.edu)

<sup>b</sup> University of Canterbury, Christchurch, New Zealand.

<sup>c</sup> Department of Chemistry, King Abdulaziz University, Jeddah, 21589 Saudi Arabia.

### Table of Contents

|                                                                                                |     |
|------------------------------------------------------------------------------------------------|-----|
| 1. NMR variation of [ <b>2a</b> ]:[ <b>1a</b> ] ratios with time (Full spectra and extensions) | S2  |
| 2. (DIP-EI) mass spectra                                                                       | S6  |
| 3. <sup>1</sup> H and <sup>13</sup> C spectra for <b>5a</b> and <b>5b</b>                      | S7  |
| 4. X-ray crystal structure of <b>5b</b>                                                        | S11 |

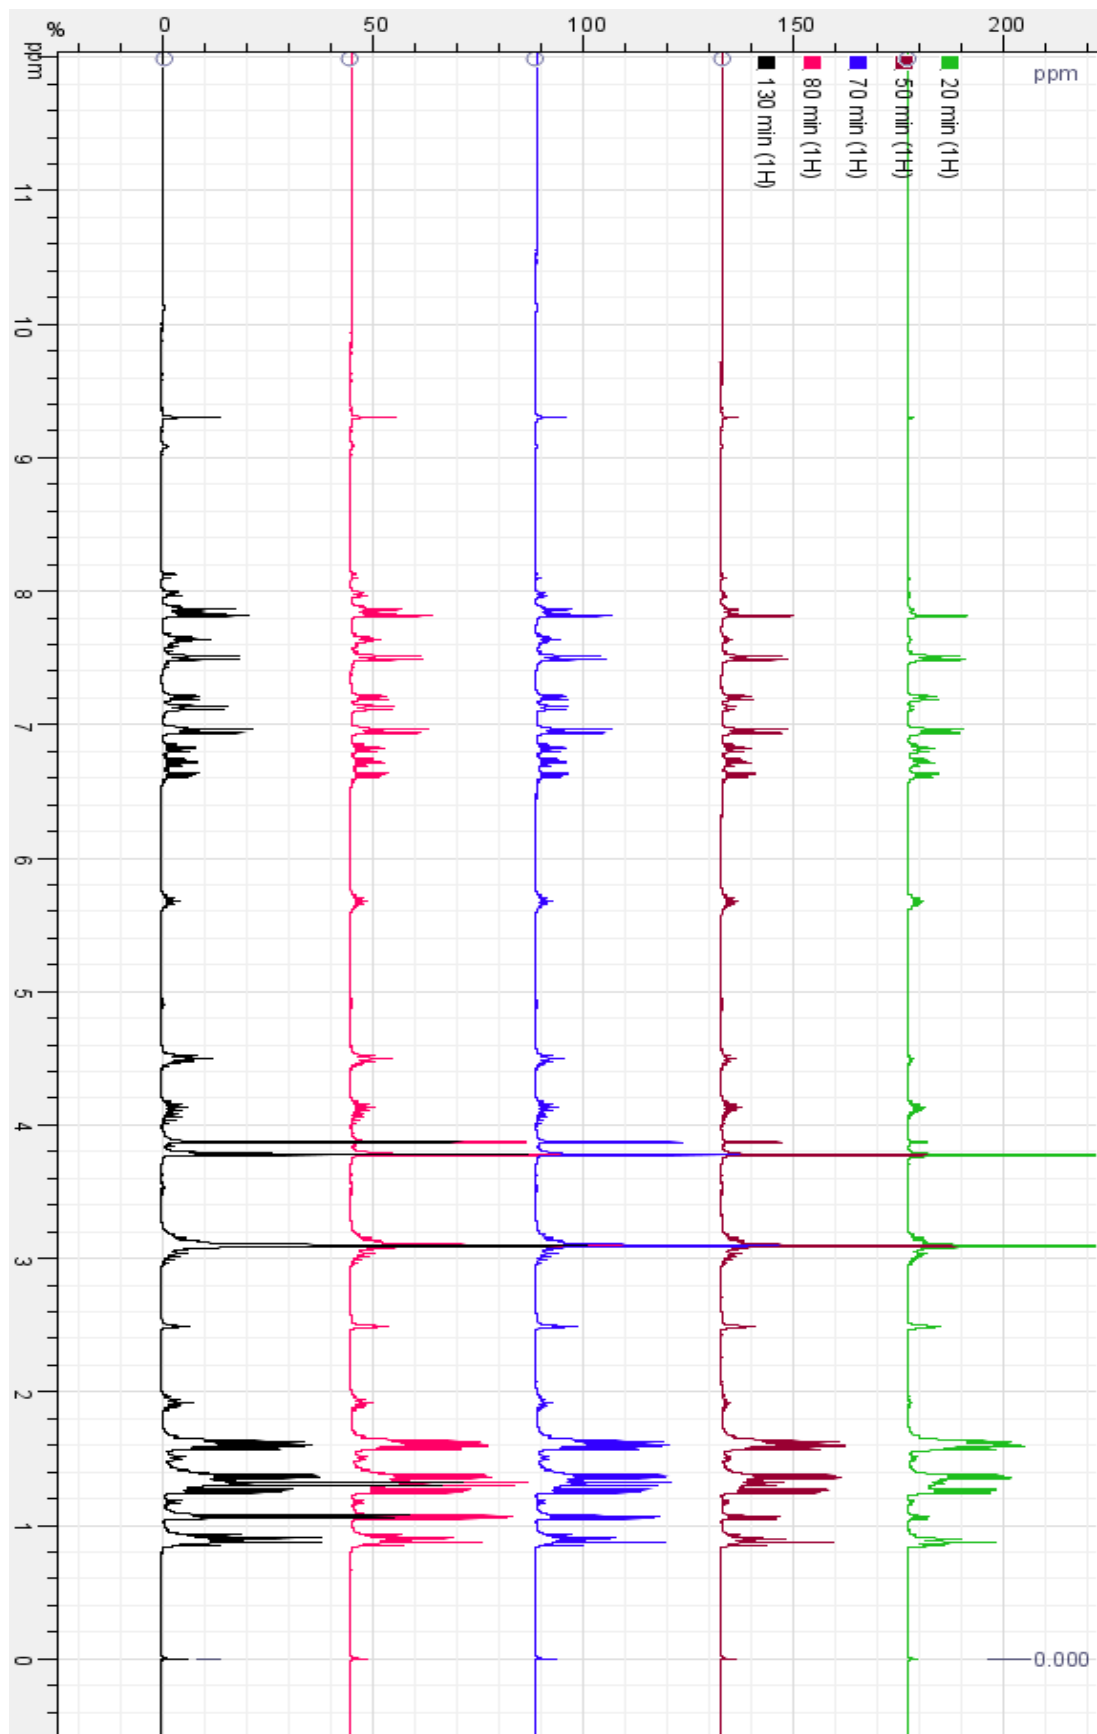

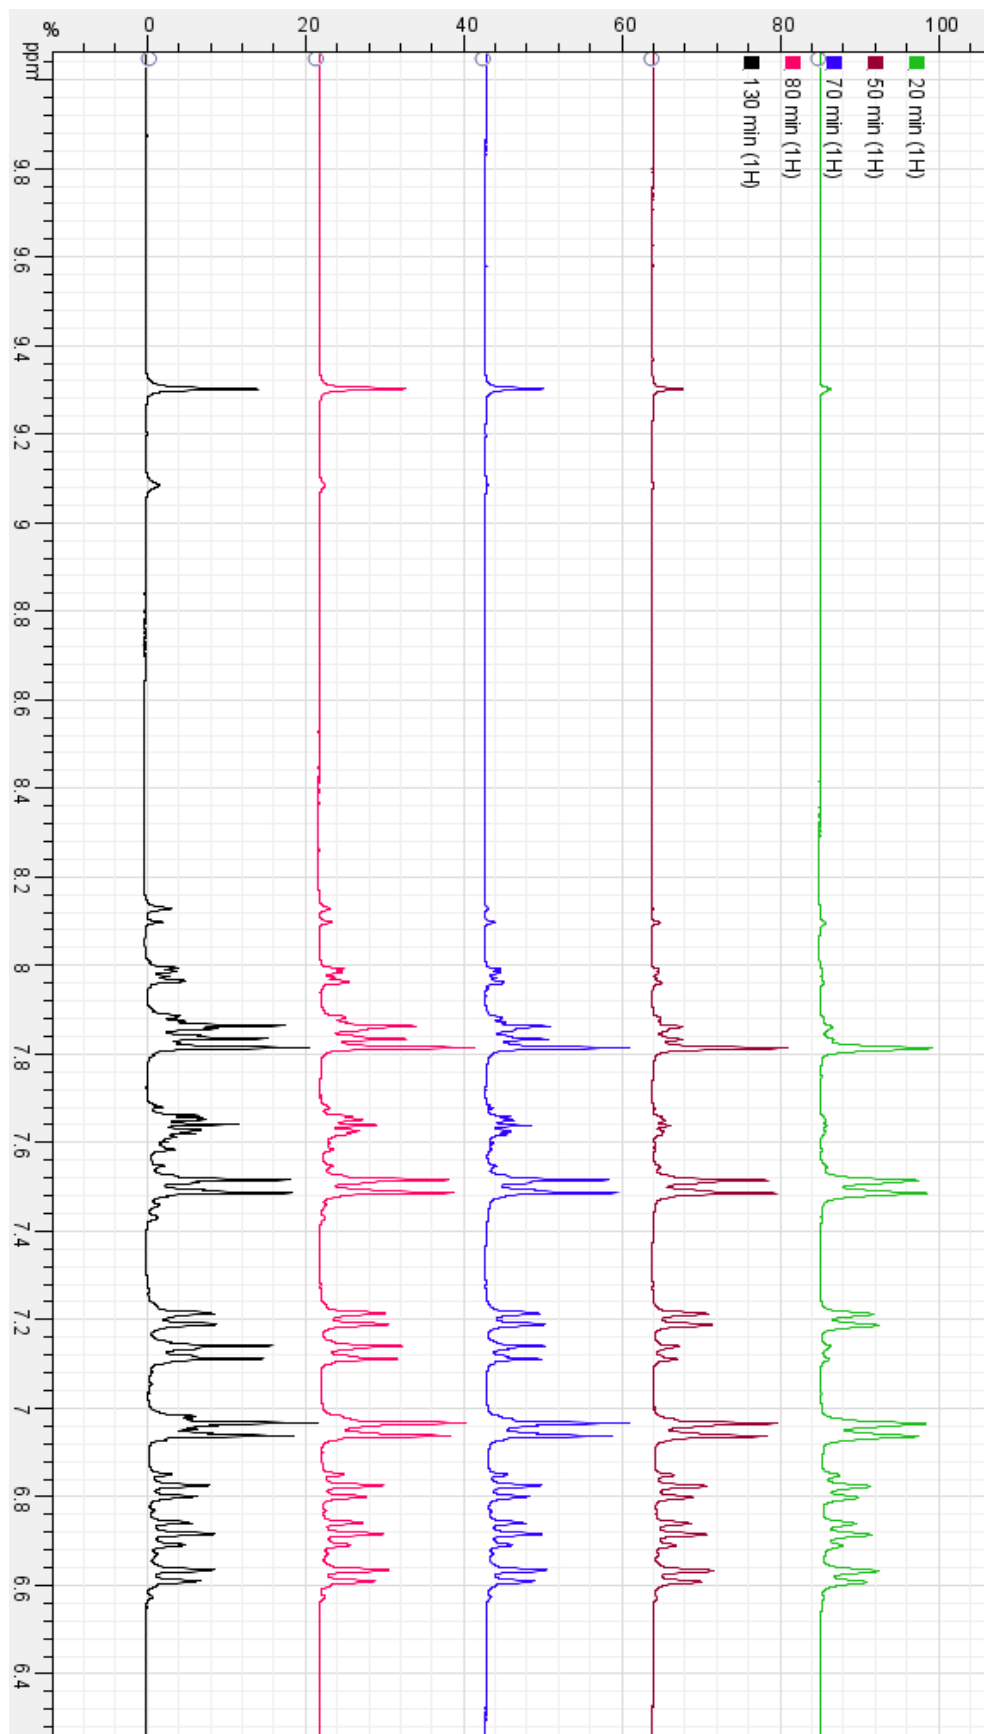

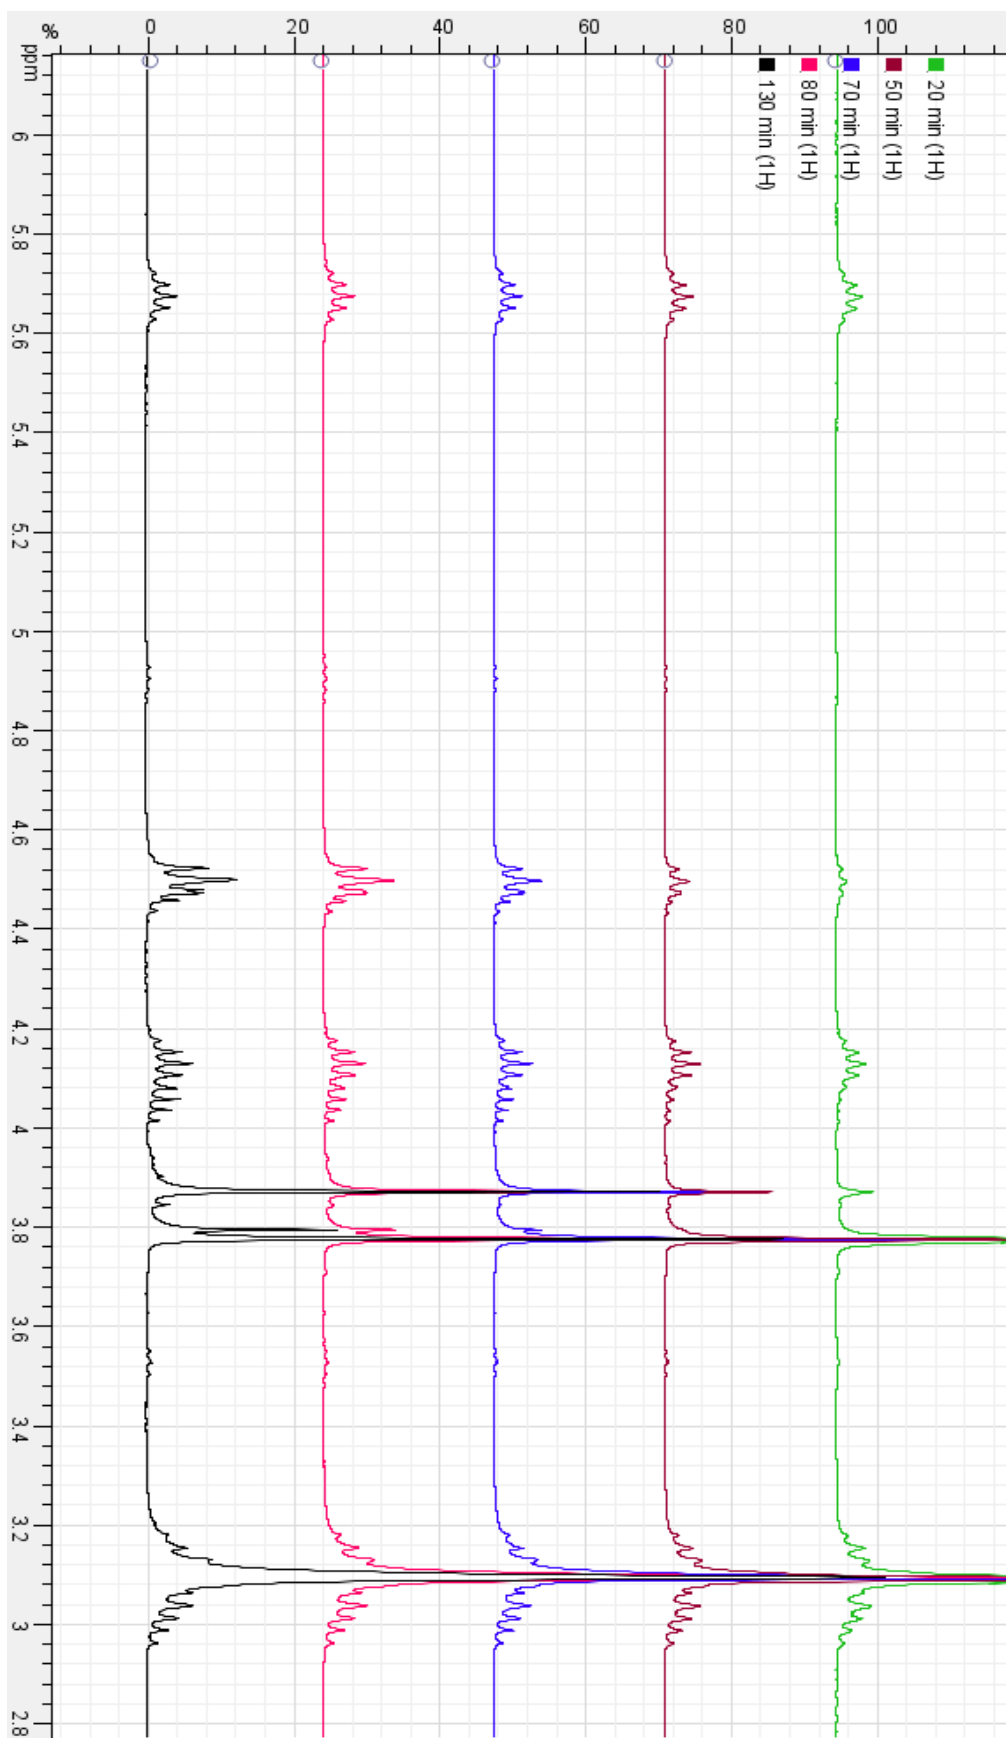

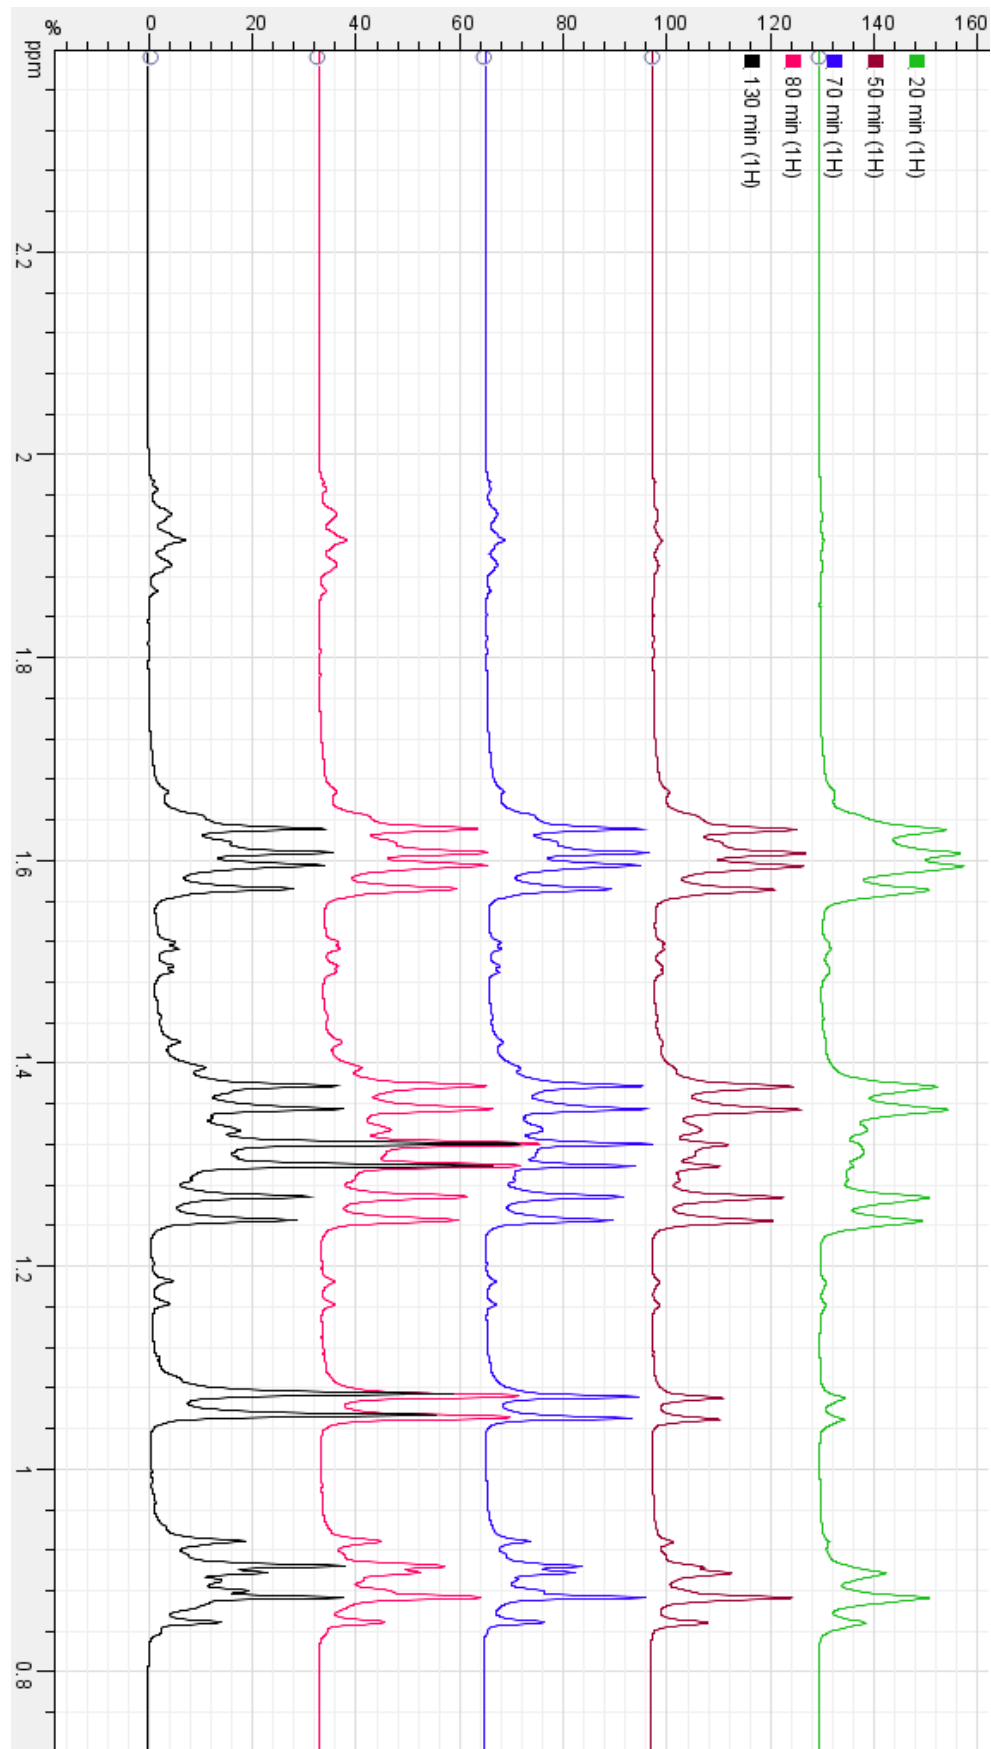

A

17625\_DIP-El\_01 #106-110 RT: 4.65-4.82 AV: 5 SB: 6 5.26-5.48 NL: 7.55E6  
T: + c Full ms [ 50.00-700.00]

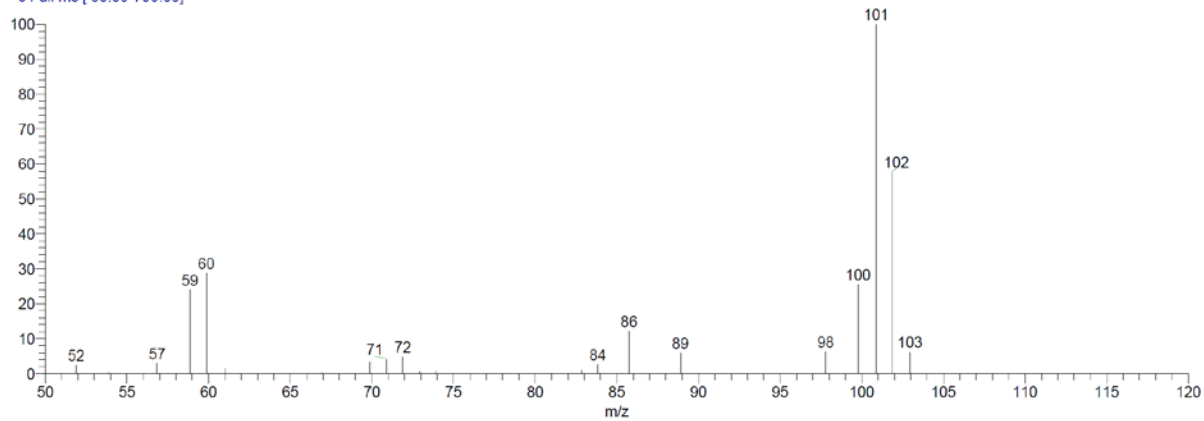

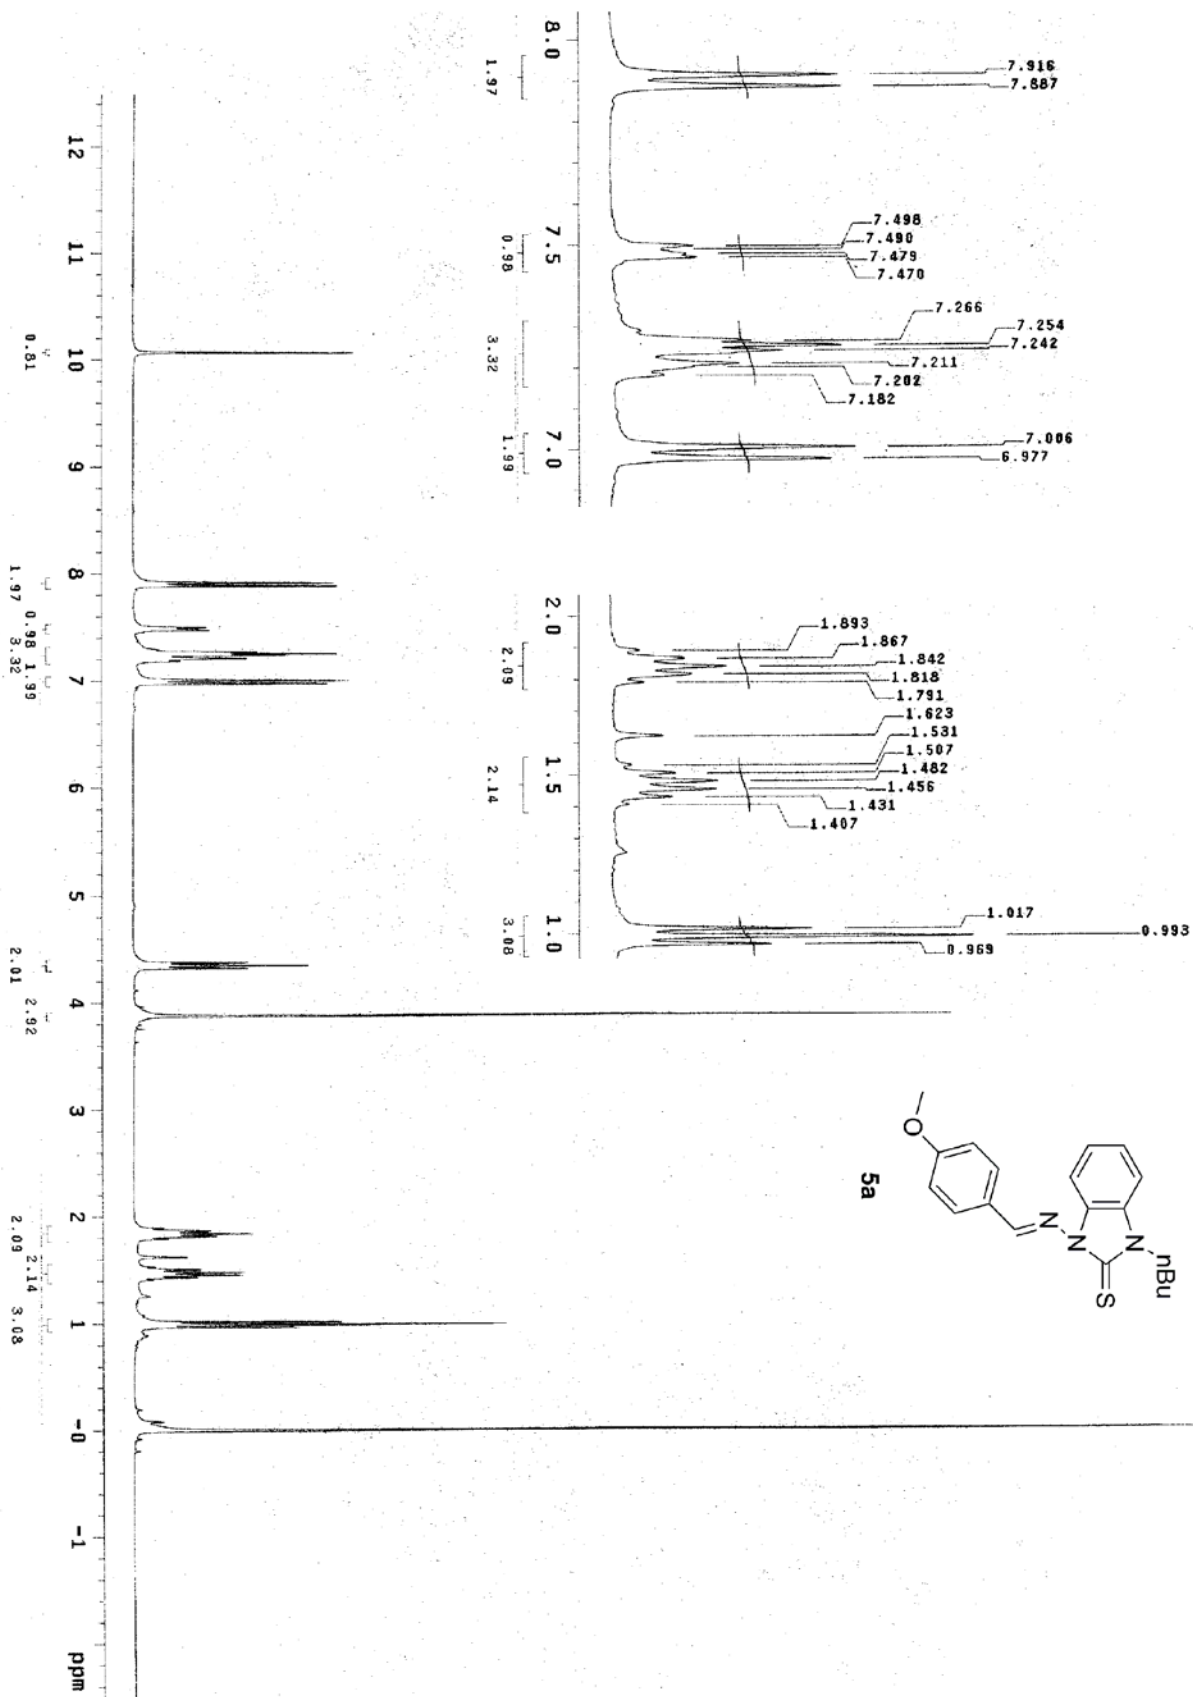

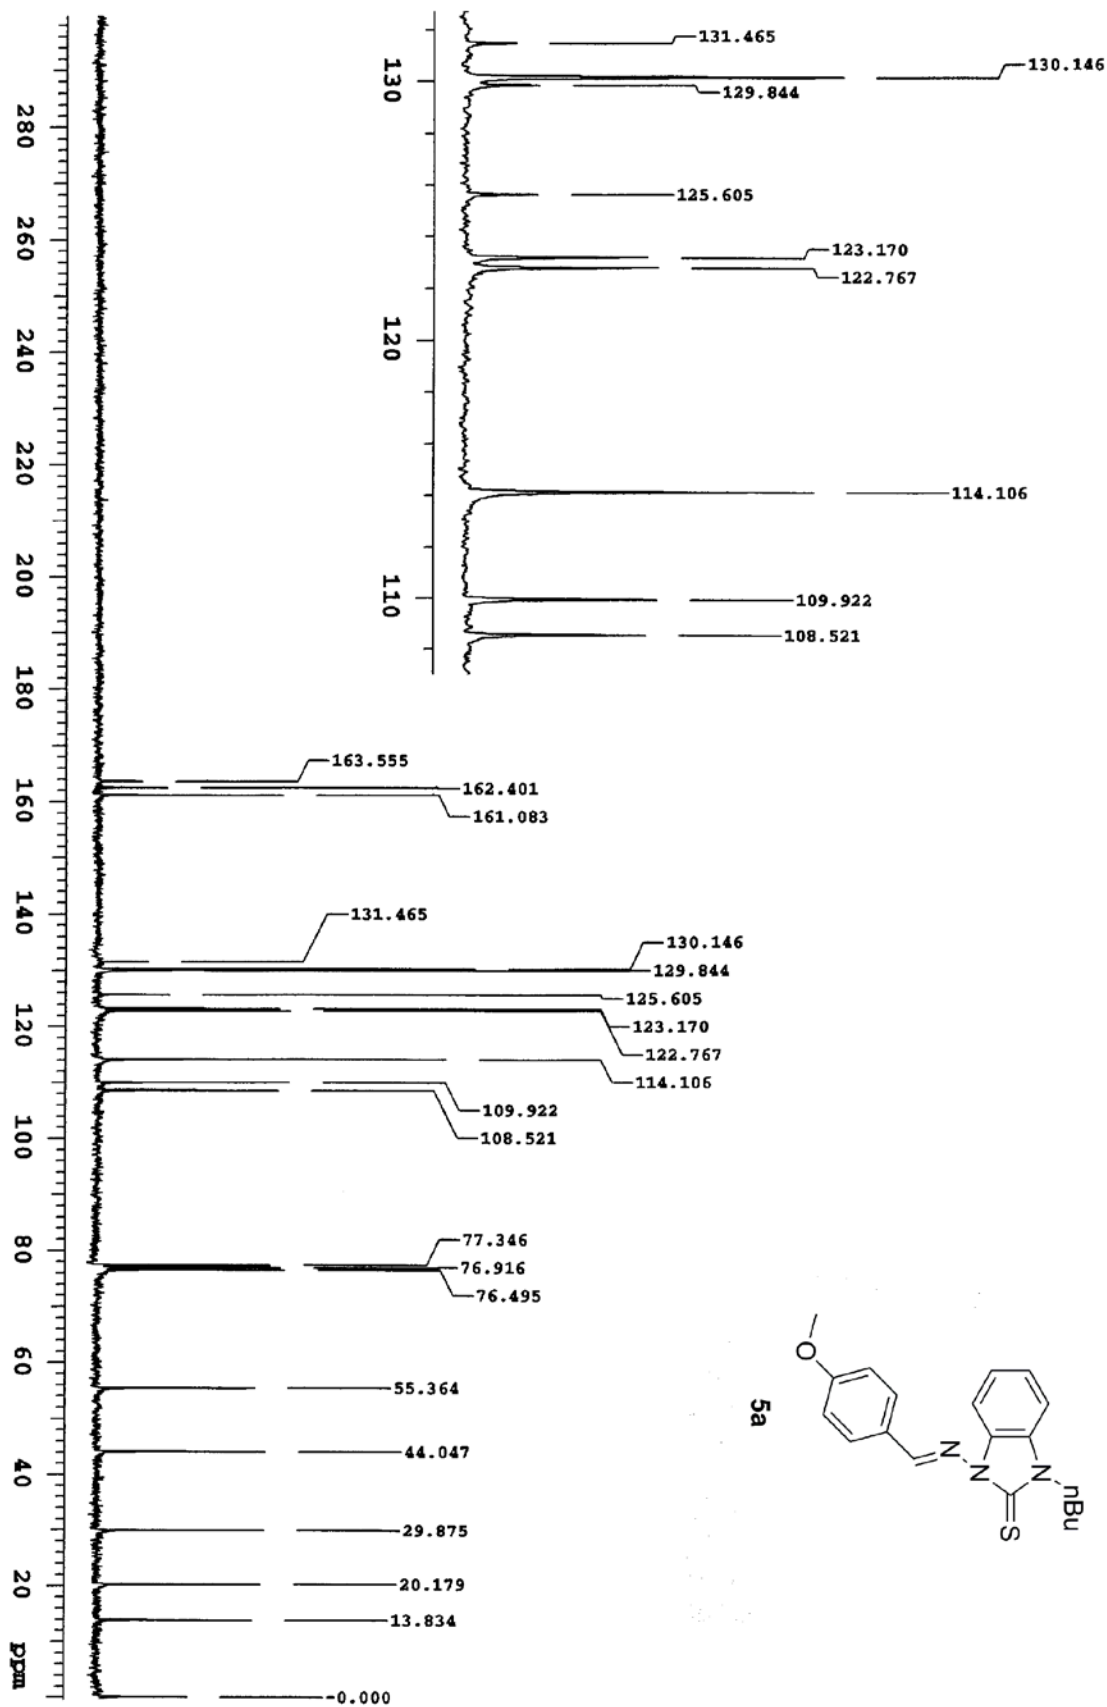



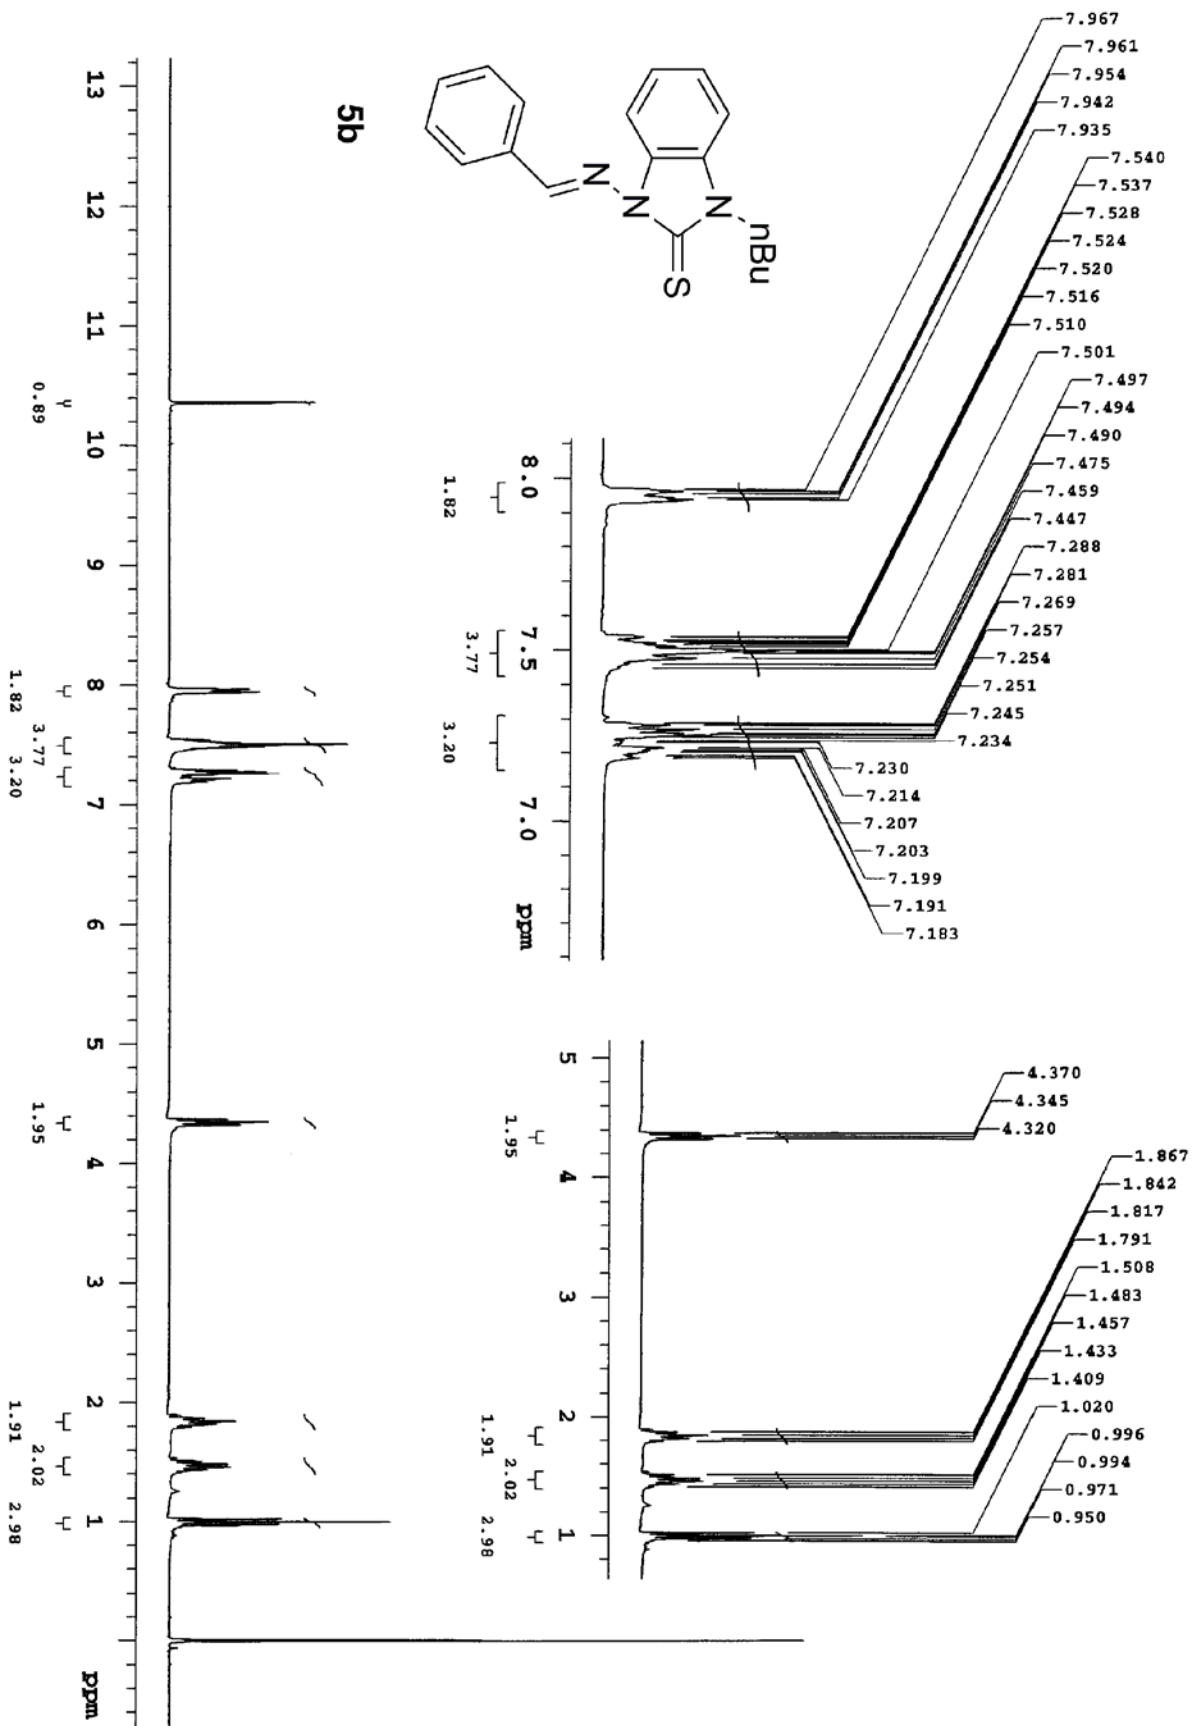

| INDEX | FREQUENCY PPM | HEIGHT  |
|-------|---------------|---------|
| 1     | 12360.197     | 163.815 |
| 2     | 12094.329     | 160.292 |
| 3     | 10060.600     | 133.338 |
| 4     | 9935.081      | 131.674 |
| 5     | 9807.973      | 129.990 |
| 6     | 9715.820      | 128.768 |
| 7     | 9693.046      | 128.466 |
| 8     | 9319.667      | 123.518 |
| 9     | 9284.182      | 123.048 |
| 10    | 8313.924      | 110.188 |
| 11    | 8201.116      | 108.693 |
| 12    | 5842.203      | 77.429  |
| 13    | 5809.896      | 77.001  |
| 14    | 5778.119      | 76.580  |
| 15    | 3342.816      | 44.039  |
| 16    | 2251.931      | 29.846  |
| 17    | 1524.237      | 20.201  |
| 18    | 1044.934      | 13.849  |
| 19    | 0.000         | 0.000   |

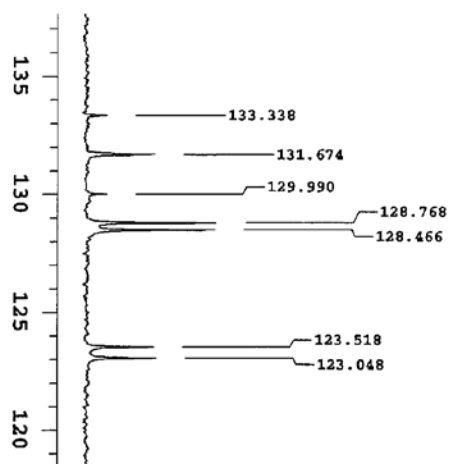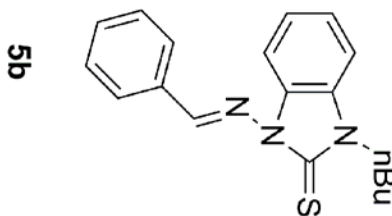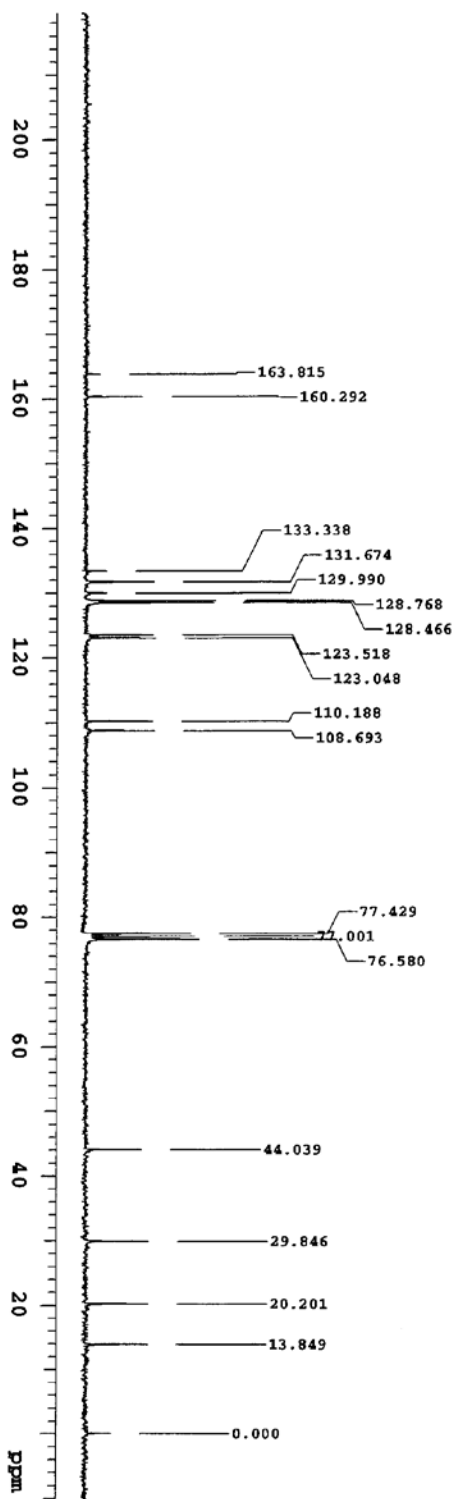

## Computing details

Data collection: 'Mon Jul 30 16:40:32 2012'; cell refinement: 'Mon Jul 30 16:40:32 2012'; data reduction: 'Mon Jul 30 16:40:32 2012'; program(s) used to solve structure: *SHELXS97* (Sheldrick, 2008); program(s) used to refine structure: *SHELXL97* (Sheldrick, 2008).

## References

NOT FOUND

## (d469)

Crystal data

|                                 |                                                         |
|---------------------------------|---------------------------------------------------------|
| $C_{18}H_{19}N_3S$              | $F(000) = 656$                                          |
| $M_r = 309.42$                  | $D_x = 1.280 \text{ Mg m}^{-3}$                         |
| Monoclinic, $P2_1/c$            | Cu $K\alpha$ radiation, $\lambda = 1.54184 \text{ \AA}$ |
| Hall symbol: -P 2ybc            | Cell parameters from 4832 reflections                   |
| $a = 5.86514 (13) \text{ \AA}$  | $\theta = 3.0\text{--}73.7^\circ$                       |
| $b = 14.6361 (3) \text{ \AA}$   | $\mu = 1.77 \text{ mm}^{-1}$                            |
| $c = 18.7566 (3) \text{ \AA}$   | $T = 120 \text{ K}$                                     |
| $\beta = 94.0394 (18)^\circ$    | Block, colorless                                        |
| $V = 1606.12 (5) \text{ \AA}^3$ | $0.50 \times 0.44 \times 0.15 \text{ mm}$               |
| $Z = 4$                         |                                                         |

Data collection

|                                                                 |                                                                        |
|-----------------------------------------------------------------|------------------------------------------------------------------------|
| SuperNova, Dual, Cu at zero, Atlas diffractometer               | 2883 independent reflections                                           |
| Radiation source: fine-focus sealed tube                        | 2446 reflections with $I > 2\sigma(I)$                                 |
| graphite                                                        | $R_{\text{int}} = 0.030$                                               |
| Detector resolution: $10.6501 \text{ pixels mm}^{-1}$           | $\theta_{\text{max}} = 67.5^\circ$ , $\theta_{\text{min}} = 3.8^\circ$ |
| $\omega$ scans                                                  | $h = -5 \rightarrow 7$                                                 |
| Absorption correction: multi-scan<br>'Mon Jul 30 16:40:32 2012' | $k = -17 \rightarrow 17$                                               |
| $T_{\text{min}} = 0.629$ , $T_{\text{max}} = 1.000$             | $l = -22 \rightarrow 22$                                               |
| 10315 measured reflections                                      |                                                                        |

## Refinement

|                                 |                                                                                   |
|---------------------------------|-----------------------------------------------------------------------------------|
| Refinement on $F^2$             | Primary atom site location: structure-invariant direct methods                    |
| Least-squares matrix: full      | Secondary atom site location: difference Fourier map                              |
| $R[F^2 > 2\sigma(F^2)] = 0.034$ | Hydrogen site location: inferred from neighbouring sites                          |
| $wR(F^2) = 0.094$               | H-atom parameters constrained                                                     |
| $S = 1.03$                      | $w = 1/[\sigma^2(F_o^2) + (0.048P)^2 + 0.655P]$<br>where $P = (F_o^2 + 2F_c^2)/3$ |
| 2883 reflections                | $(\Delta/\sigma)_{\max} = 0.001$                                                  |
| 199 parameters                  | $\Delta)_{\max} = 0.21 \text{ e } \text{Å}^{-3}$                                  |
| 0 restraints                    | $\Delta)_{\min} = -0.20 \text{ e } \text{Å}^{-3}$                                 |

## Special details

**Geometry.** All esds (except the esd in the dihedral angle between two l.s. planes) are estimated using the full covariance matrix. The cell esds are taken into account individually in the estimation of esds in distances, angles and torsion angles; correlations between esds in cell parameters are only used when they are defined by crystal symmetry. An approximate (isotropic) treatment of cell esds is used for estimating esds involving l.s. planes.

**Refinement.** Refinement of  $F^2$  against ALL reflections. The weighted R-factor  $wR$  and goodness of fit  $S$  are based on  $F^2$ , conventional R-factors  $R$  are based on  $F$ , with  $F$  set to zero for negative  $F^2$ . The threshold expression of  $F^2 > 2\sigma(F^2)$  is used only for calculating R-factors(gt) etc. and is not relevant to the choice of reflections for refinement. R-factors based on  $F^2$  are statistically about twice as large as those based on  $F$ , and R-factors based on ALL data will be even larger.

Fractional atomic coordinates and isotropic or equivalent isotropic displacement parameters ( $\text{Å}^2$ )

|     | $x$         | $y$          | $z$         | $U_{\text{iso}}^*/U_{\text{eq}}$ |
|-----|-------------|--------------|-------------|----------------------------------|
| N1  | -0.0317 (2) | 0.85784 (9)  | 0.29438 (7) | 0.0203 (3)                       |
| C2  | 0.1103 (3)  | 0.81466 (10) | 0.34651 (8) | 0.0214 (3)                       |
| S2  | 0.08430 (8) | 0.80657 (3)  | 0.43433 (2) | 0.02832 (14)                     |
| N3  | 0.2790 (2)  | 0.77503 (9)  | 0.31040 (7) | 0.0209 (3)                       |
| C4  | 0.3720 (3)  | 0.76616 (11) | 0.18065 (8) | 0.0231 (4)                       |
| H4A | 0.5046      | 0.7314       | 0.1875      | 0.028*                           |
| C5  | 0.2912 (3)  | 0.79587 (11) | 0.11318 (9) | 0.0246 (4)                       |
| H5A | 0.3717      | 0.7806       | 0.0739      | 0.030*                           |

|      |             |              |              |            |
|------|-------------|--------------|--------------|------------|
| C6   | 0.0932 (3)  | 0.84788 (11) | 0.10281 (8)  | 0.0246 (4) |
| H6A  | 0.0445      | 0.8663       | 0.0568       | 0.030*     |
| C7   | -0.0341 (3) | 0.87311 (11) | 0.15962 (8)  | 0.0232 (4) |
| H7A  | -0.1662     | 0.9081       | 0.1529       | 0.028*     |
| C8   | 0.0476 (3)  | 0.84304 (10) | 0.22678 (8)  | 0.0198 (3) |
| C9   | 0.2448 (3)  | 0.79094 (10) | 0.23725 (8)  | 0.0200 (3) |
| C10  | 0.4627 (3)  | 0.71937 (11) | 0.34413 (9)  | 0.0234 (4) |
| H10A | 0.5044      | 0.7431       | 0.3916       | 0.028*     |
| H10B | 0.5958      | 0.7237       | 0.3164       | 0.028*     |
| C11  | 0.3935 (3)  | 0.61947 (11) | 0.34994 (9)  | 0.0257 (4) |
| H11A | 0.2640      | 0.6150       | 0.3792       | 0.031*     |
| H11B | 0.3460      | 0.5965       | 0.3027       | 0.031*     |
| C12  | 0.5879 (3)  | 0.56046 (12) | 0.38251 (10) | 0.0317 (4) |
| H12A | 0.5389      | 0.4972       | 0.3817       | 0.038*     |
| H12B | 0.7171      | 0.5653       | 0.3531       | 0.038*     |
| C13  | 0.6653 (4)  | 0.58666 (13) | 0.45894 (11) | 0.0446 (5) |
| H13A | 0.7876      | 0.5471       | 0.4763       | 0.067*     |
| H13B | 0.5395      | 0.5806       | 0.4887       | 0.067*     |
| H13C | 0.7177      | 0.6488       | 0.4601       | 0.067*     |
| N2   | -0.2307 (2) | 0.90894 (9)  | 0.29860 (7)  | 0.0218 (3) |
| C14  | -0.2561 (3) | 0.95293 (11) | 0.35664 (8)  | 0.0224 (3) |
| H14A | -0.1469     | 0.9484       | 0.3949       | 0.027*     |
| C15  | -0.4584 (3) | 1.01023 (10) | 0.36212 (8)  | 0.0223 (4) |
| C16  | -0.6298 (3) | 1.01697 (11) | 0.30652 (9)  | 0.0252 (4) |
| H16A | -0.6179     | 0.9838       | 0.2647       | 0.030*     |
| C17  | -0.8164 (3) | 1.07284 (12) | 0.31377 (11) | 0.0318 (4) |
| H17A | -0.9285     | 1.0779       | 0.2764       | 0.038*     |
| C18  | -0.8377 (3) | 1.12156 (12) | 0.37664 (11) | 0.0356 (5) |
| H18A | -0.9651     | 1.1582       | 0.3816       | 0.043*     |
| C19  | -0.6697 (3) | 1.11537 (12) | 0.43156 (10) | 0.0333 (4) |
| H19A | -0.6840     | 1.1479       | 0.4736       | 0.040*     |
| C20  | -0.4792 (3) | 1.06074 (11) | 0.42449 (9)  | 0.0276 (4) |
| H20A | -0.3650     | 1.0578       | 0.4614       | 0.033*     |

Atomic displacement parameters ( $\text{\AA}^2$ )

|     | $U^{11}$    | $U^{22}$    | $U^{33}$    | $U^{12}$     | $U^{13}$     | $U^{23}$     |
|-----|-------------|-------------|-------------|--------------|--------------|--------------|
| N1  | 0.0209 (7)  | 0.0210 (7)  | 0.0191 (6)  | 0.0026 (5)   | 0.0028 (5)   | 0.0000 (5)   |
| C2  | 0.0231 (9)  | 0.0187 (8)  | 0.0222 (8)  | -0.0004 (6)  | 0.0005 (6)   | 0.0008 (6)   |
| S2  | 0.0349 (3)  | 0.0315 (2)  | 0.0189 (2)  | 0.00585 (18) | 0.00411 (17) | 0.00303 (15) |
| N3  | 0.0219 (7)  | 0.0207 (7)  | 0.0198 (7)  | 0.0027 (5)   | 0.0008 (5)   | 0.0011 (5)   |
| C4  | 0.0230 (9)  | 0.0200 (8)  | 0.0268 (8)  | 0.0006 (7)   | 0.0039 (7)   | -0.0018 (6)  |
| C5  | 0.0297 (10) | 0.0221 (8)  | 0.0228 (8)  | -0.0034 (7)  | 0.0077 (7)   | -0.0028 (6)  |
| C6  | 0.0310 (9)  | 0.0226 (8)  | 0.0199 (8)  | -0.0028 (7)  | -0.0007 (7)  | 0.0007 (6)   |
| C7  | 0.0248 (9)  | 0.0203 (8)  | 0.0242 (8)  | 0.0012 (7)   | -0.0011 (7)  | 0.0008 (6)   |
| C8  | 0.0202 (8)  | 0.0170 (7)  | 0.0222 (8)  | -0.0014 (6)  | 0.0024 (6)   | -0.0015 (6)  |
| C9  | 0.0225 (9)  | 0.0169 (7)  | 0.0203 (8)  | -0.0021 (6)  | 0.0006 (6)   | 0.0007 (6)   |
| C10 | 0.0218 (9)  | 0.0236 (8)  | 0.0244 (8)  | 0.0028 (7)   | -0.0016 (7)  | 0.0020 (6)   |
| C11 | 0.0268 (9)  | 0.0222 (8)  | 0.0275 (8)  | 0.0019 (7)   | -0.0028 (7)  | -0.0014 (7)  |
| C12 | 0.0338 (10) | 0.0225 (8)  | 0.0373 (10) | 0.0030 (8)   | -0.0081 (8)  | 0.0018 (7)   |
| C13 | 0.0625 (14) | 0.0275 (10) | 0.0400 (11) | -0.0002 (10) | -0.0225 (10) | 0.0057 (8)   |
| N2  | 0.0199 (7)  | 0.0201 (6)  | 0.0257 (7)  | 0.0025 (5)   | 0.0039 (6)   | 0.0011 (5)   |
| C14 | 0.0239 (9)  | 0.0204 (8)  | 0.0231 (8)  | -0.0012 (7)  | 0.0031 (7)   | 0.0025 (6)   |
| C15 | 0.0245 (9)  | 0.0176 (7)  | 0.0257 (8)  | -0.0019 (7)  | 0.0085 (7)   | 0.0029 (6)   |
| C16 | 0.0237 (9)  | 0.0198 (8)  | 0.0326 (9)  | -0.0029 (7)  | 0.0055 (7)   | 0.0004 (7)   |
| C17 | 0.0226 (9)  | 0.0246 (9)  | 0.0484 (11) | -0.0014 (7)  | 0.0045 (8)   | 0.0047 (8)   |
| C18 | 0.0288 (10) | 0.0205 (8)  | 0.0600 (12) | 0.0027 (7)   | 0.0207 (9)   | 0.0029 (8)   |
| C19 | 0.0418 (12) | 0.0222 (8)  | 0.0386 (10) | -0.0002 (8)  | 0.0218 (9)   | -0.0018 (7)  |
| C20 | 0.0357 (10) | 0.0225 (8)  | 0.0259 (9)  | -0.0011 (7)  | 0.0108 (7)   | 0.0027 (7)   |

Geometric parameters ( $\text{\AA}$ ,  $^\circ$ )

|        |             |         |           |
|--------|-------------|---------|-----------|
| N1—C2  | 1.391 (2)   | C8—C9   | 1.388 (2) |
| N1—N2  | 1.3929 (18) | C10—C11 | 1.523 (2) |
| N1—C8  | 1.3979 (19) | C11—C12 | 1.523 (2) |
| C2—N3  | 1.367 (2)   | C12—C13 | 1.522 (2) |
| C2—S2  | 1.6692 (16) | N2—C14  | 1.283 (2) |
| N3—C9  | 1.3922 (19) | C14—C15 | 1.463 (2) |
| N3—C10 | 1.459 (2)   | C15—C20 | 1.397 (2) |

|           |             |             |             |
|-----------|-------------|-------------|-------------|
| C4—C9     | 1.388 (2)   | C15—C16     | 1.400 (2)   |
| C4—C5     | 1.389 (2)   | C16—C17     | 1.381 (2)   |
| C5—C6     | 1.391 (2)   | C17—C18     | 1.391 (3)   |
| C6—C7     | 1.393 (2)   | C18—C19     | 1.377 (3)   |
| C7—C8     | 1.387 (2)   | C19—C20     | 1.388 (3)   |
|           |             |             |             |
| C2—N1—N2  | 131.81 (13) | C8—C9—C4    | 121.52 (15) |
| C2—N1—C8  | 110.26 (13) | C8—C9—N3    | 106.98 (13) |
| N2—N1—C8  | 117.92 (12) | C4—C9—N3    | 131.48 (15) |
| N3—C2—N1  | 105.25 (13) | N3—C10—C11  | 112.01 (14) |
| N3—C2—S2  | 125.33 (12) | C12—C11—C10 | 112.17 (14) |
| N1—C2—S2  | 129.37 (12) | C13—C12—C11 | 113.59 (15) |
| C2—N3—C9  | 111.00 (13) | C14—N2—N1   | 117.76 (13) |
| C2—N3—C10 | 124.08 (13) | N2—C14—C15  | 119.40 (15) |
| C9—N3—C10 | 124.84 (13) | C20—C15—C16 | 119.10 (16) |
| C9—C4—C5  | 116.59 (15) | C20—C15—C14 | 118.79 (16) |
| C4—C5—C6  | 121.78 (15) | C16—C15—C14 | 122.11 (15) |
| C5—C6—C7  | 121.68 (15) | C17—C16—C15 | 120.07 (16) |
| C8—C7—C6  | 116.17 (15) | C16—C17—C18 | 120.40 (18) |
| C7—C8—C9  | 122.27 (15) | C19—C18—C17 | 119.88 (17) |
| C7—C8—N1  | 131.20 (15) | C18—C19—C20 | 120.30 (17) |
| C9—C8—N1  | 106.50 (13) | C19—C20—C15 | 120.23 (17) |
